# Supplementary material for: A many-body energy decomposition analysis (MB-EDA) scheme based on a target state optimization self-consistent field (TSO-SCF) method
Source: Royal Society of Chemistry journal article supplement (doi:10.1039/d4cp01259c), 2024-01-01
Supplement: d4cp01259c1.pdf [file d4cp01259c1.pdf]

## Supporting Information

### Many-Body Energy Decomposition Analysis (MB-EDA) Scheme based on Target State Optimization Self-Consistent Field (TSO-SCF) Method

Zhen Tang<sup>a, b</sup>, Hong Zhu<sup>a, b</sup>, Zhijun Pan<sup>b</sup>, Jiali Gao<sup>\*, a, b, c</sup>, Jun Zhang<sup>\*, b</sup>

- a. Peking University Shenzhen Graduate School, Shenzhen, Guangdong 518055, People's Republic of  
China
- b. Institute of Systems and Physical Biology, Shenzhen Bay Laboratory, Shenzhen, Guangdong 518055,  
People's Republic of China.
- c. Department of Chemistry and Supercomputing Institute, University of Minnesota, Minneapolis, MN  
55455, USA

E-mail: [jjiali@jjialigao.org](mailto:jjiali@jjialigao.org); [zhangjun@szbl.ac.cn](mailto:zhangjun@szbl.ac.cn)

## S1. Additional Figures on Interactions

(a)

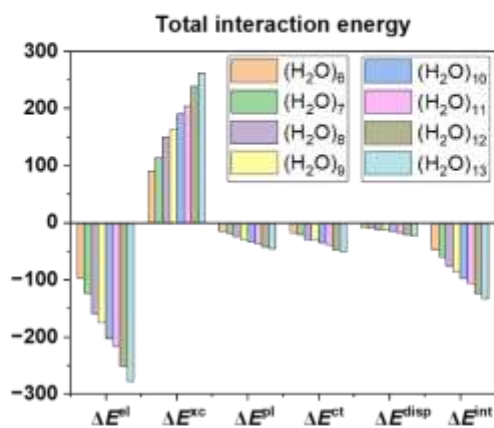

(b)

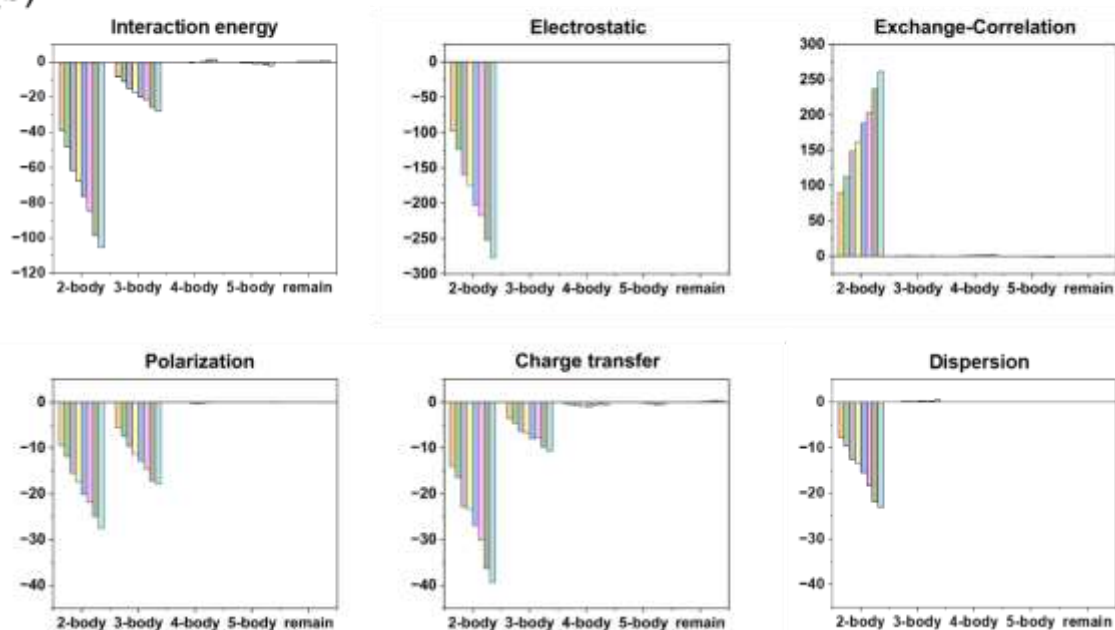

**Figure S1.** (a) EDA and (b) MB-EDA results of water clusters with 6-13 monomers. Computational method is B3LYP-D3(BJ)/6-31+G(d), energy unit is kcal/mol.

(a)

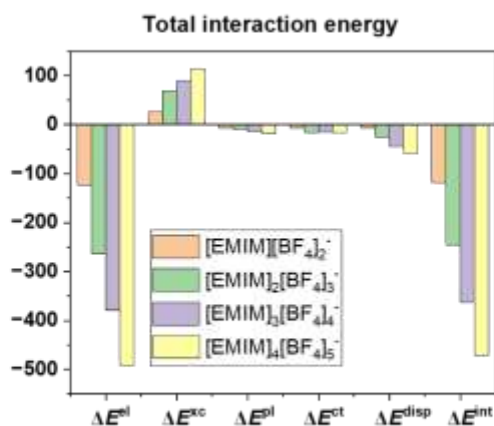

(b)

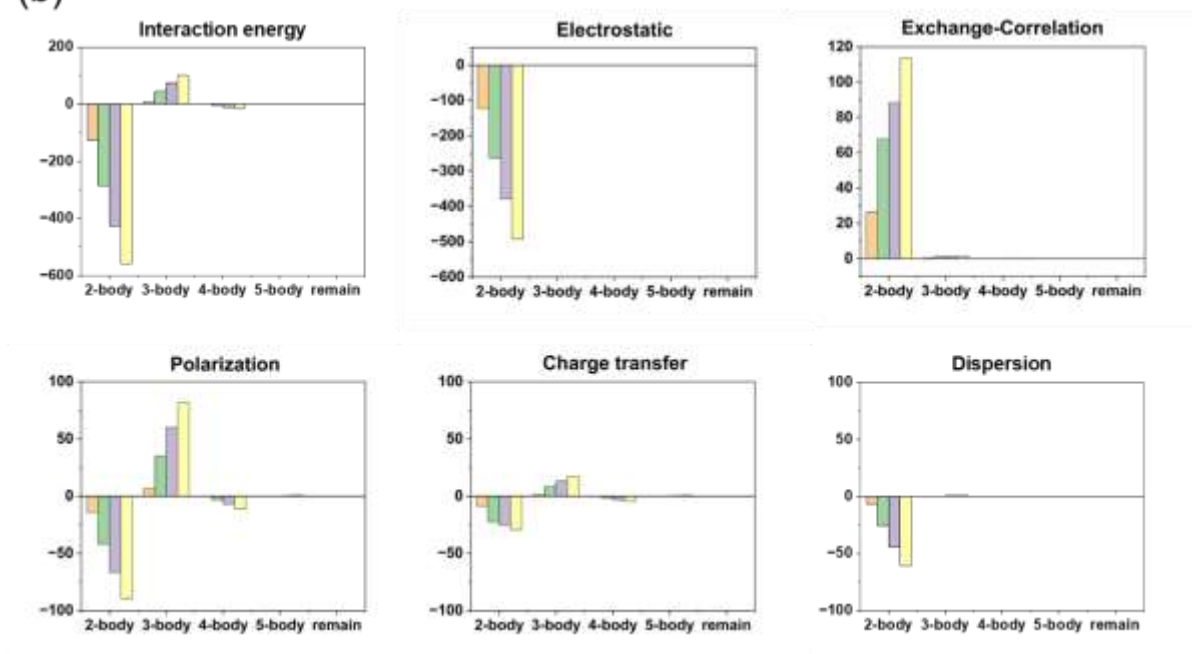

**Figure S2.** (a) EDA and (b) MB-EDA results of  $[\text{EMIM}]_m[\text{BF}_4]_{m+1}^-$  ( $m = 1\sim 4$ ) clusters. Computational method is B3LYP-D3(BJ)/def2-SVP, energy unit is kcal/mol.

## S2. Many-Body Polarization Effects

In the optimized target state  $\Psi_S^{\text{TSO}}$ , the total charge of each monomer remains unchanged, the charge within a monomer is redistributed due to the polarization effect of the presence of other monomers. The change in the charge of an atom or group within monomer will reflect the polarization effect.

In the optimized supermolecule state  $\Psi_S^{\text{S}}$ , the total charge of each monomer no longer remains constant, the charge of the entire system will be redistributed. Transferred charge of a monomer is the change in its total charge from  $\Psi_S^{\text{TSO}}$  to  $\Psi_S^{\text{S}}$  state.

In many-body expansion formalism for a cluster system of  $N$  monomers, the charge population for different expanding order is different. According to Eq. (13) in the main text, there are  $\binom{N}{n}$  combination

ways for  $n$ -body sub-system, and each subsystem has a different electronic density population. Therefore, we should use an average approach to analyze the charge changes of the cluster system when it is truncated to  $n$ -body order in MBE.

In the  $n$ -body summation term of MBE according to Eq. (13), a specified monomer A will appear  $\binom{N-1}{n-1}$  times, and each of the other monomers will appear  $\binom{N-2}{n-2}$  times in these  $\binom{N-1}{n-1}$  sub-terms. Therefore, the average influence of the other monomers on monomer A can be expressed as:

$$\overline{\Delta\rho} = \frac{\sum_{i=1}^{\binom{N-1}{n-1}} \Delta\rho}{\binom{N-2}{n-2}} \quad (S1)$$

Where  $\Delta\rho$  can be the charge difference of an atom or group within monomer A from  $\Psi_S^0$  to  $\Psi_S^{\text{TSO}}$  state, which can be used as an indicator of polarization effect, or the transferred charge of monomer A from  $\Psi_S^{\text{TSO}}$  to  $\Psi_S^S$  state, which directly reflects charge transfer effects, as mentioned above.

Mulliken charges are used in the following calculations.

**Table S1.** Illustration for many-body polarization effect of four water hexamer clusters in optimized target state  $\Psi_S^{\text{TSO}}$ . Average changes of the Mulliken charges for each atom within the selected monomer which has the most negative oxygen atom are shown. Computational method is B3LYP-D3(BJ)/aug-cc-pVTZ.

|       |    | Origin*   | 2-body    | 3-body    | 4-body    | 5-body    | 6-body    |
|-------|----|-----------|-----------|-----------|-----------|-----------|-----------|
| Cage  | O  | -0.368612 | -0.201011 | -0.210844 | -0.220407 | -0.229589 | -0.238099 |
|       | H1 | 0.180715  | 0.076052  | 0.082358  | 0.088663  | 0.095067  | 0.101379  |
|       | H2 | 0.187896  | 0.124959  | 0.128485  | 0.131744  | 0.134523  | 0.136720  |
| Prism | O  | -0.371207 | -0.192062 | -0.199021 | -0.205937 | -0.212204 | -0.217531 |
|       | H1 | 0.191381  | 0.134018  | 0.137890  | 0.141596  | 0.144998  | 0.147995  |
|       | H2 | 0.179826  | 0.058043  | 0.061131  | 0.064342  | 0.067206  | 0.069536  |
| Book  | O  | -0.370519 | -0.161903 | -0.162340 | -0.162940 | -0.163382 | -0.163567 |
|       | H1 | 0.198075  | 0.180862  | 0.182289  | 0.183916  | 0.185562  | 0.187109  |
|       | H2 | 0.172444  | -0.018958 | -0.019949 | -0.020976 | -0.022180 | -0.023541 |
| Ring  | O  | -0.365335 | -0.131745 | -0.130286 | -0.128550 | -0.126476 | -0.123749 |
|       | H1 | 0.171362  | -0.018267 | -0.019058 | -0.019993 | -0.021214 | -0.022737 |
|       | H2 | 0.193973  | 0.150012  | 0.149345  | 0.148543  | 0.147689  | 0.146485  |

\*The Mulliken charges of isolated monomer.

**Table S2.** The numbers of transferred Mulliken charges for each monomer of four water hexamer clusters in

optimized super-molecular state  $\Psi_S^S$ . Computational method is B3LYP-D3(BJ)/aug-cc-pVTZ.

|       | Monomer 1  | Monomer 2  | Monomer 3 | Monomer 4  | Monomer 5 | Monomer 6 |
|-------|------------|------------|-----------|------------|-----------|-----------|
| Cage  | -0.053574* | 0.050323   | -0.020299 | 0.040760   | 0.006662  | -0.023872 |
| Prism | -0.042048  | -0.052243* | 0.026748  | 0.058479   | 0.033438  | -0.024374 |
| Book  | -0.056478* | 0.023733   | 0.009581  | 0.005499   | 0.010681  | 0.006985  |
| Ring  | -0.000893  | -0.000002  | -0.000002 | -0.000894* | 0.000896  | 0.000895  |

\*The monomer will be selected for further analysis in Table S3.

**Table S3.** Illustration for many-body charge transfer effect of four water hexamer clusters in optimized super-molecular state  $\Psi_S^S$ . The numbers of average transferred Mulliken charges for the selected monomer which has the most negative transferred charge value are shown. Computational method is B3LYP-D3(BJ)/aug-cc-pVTZ.

|       | 2-body    | 3-body    | 4-body    | 5-body    | 6-body    |
|-------|-----------|-----------|-----------|-----------|-----------|
| Cage  | -0.032416 | -0.039896 | -0.044993 | -0.049595 | -0.053574 |
| Prism | -0.016368 | -0.022859 | -0.029974 | -0.039111 | -0.052243 |
| Book  | -0.025302 | -0.032875 | -0.039727 | -0.047222 | -0.056478 |
| Ring  | -0.000381 | -0.000492 | -0.000672 | -0.000781 | -0.000894 |

**Table S4.** The numbers of the transferred Mulliken charges for each monomer of  $[\text{EMIM}]_m[\text{BF}_4]_{m+1}^-$  ( $m = 1\sim 4$ ) cluster systems in optimized super-molecular state  $\Psi_S^S$ . Negative electronic charges transfer from  $\text{BF}_4^-$  to  $\text{EMIM}^+$ . Computational method is B3LYP-D3(BJ)/def2-SVP.

|           | $[\text{EMIM}]_1[\text{BF}_4]_2^-$ | $[\text{EMIM}]_2[\text{BF}_4]_3^-$ | $[\text{EMIM}]_3[\text{BF}_4]_4^-$ | $[\text{EMIM}]_4[\text{BF}_4]_5^-$ |
|-----------|------------------------------------|------------------------------------|------------------------------------|------------------------------------|
| Monomer 1 | -0.340164                          | -0.395163                          | -0.364125                          | -0.354157                          |
| Monomer 2 | 0.145699                           | -0.394497                          | -0.347297                          | -0.288923                          |
| Monomer 3 | 0.194466*                          | 0.248137                           | -0.374148                          | -0.342143                          |
| Monomer 4 | -                                  | 0.263577                           | 0.256138                           | -0.364230                          |
| Monomer 5 | -                                  | 0.277945*                          | 0.286008                           | 0.248145                           |
| Monomer 6 | -                                  | -                                  | 0.306012*                          | 0.228512                           |
| Monomer 7 | -                                  | -                                  | 0.237411                           | 0.310201                           |
| Monomer 8 | -                                  | -                                  | -                                  | 0.325146                           |
| Monomer 9 | -                                  | -                                  | -                                  | 0.325146*                          |

\*The monomer will be selected for further analysis in Table S5.

**Table S5.** Illustration for many-body charge transfer effect of  $[\text{EMIM}]_m[\text{BF}_4]_{m+1}^-$  ( $m = 1\sim 4$ ) cluster systems in optimized super-molecular state  $\Psi_S^S$ . The monomer  $\text{BF}_4^-$  with the most positive transferred charge value was selected for analysis. Computational method is B3LYP-D3(BJ)/aug-cc-pVTZ.

|                                    | 2-body   | 3-body   | 4-body   | 5-body   | N-body   |
|------------------------------------|----------|----------|----------|----------|----------|
| $[\text{EMIM}]_1[\text{BF}_4]_2^-$ | 0.210621 | 0.194466 | -        | -        | -        |
| $[\text{EMIM}]_2[\text{BF}_4]_3^-$ | 0.350414 | 0.320941 | 0.297064 | 0.277945 | -        |
| $[\text{EMIM}]_3[\text{BF}_4]_4^-$ | 0.405559 | 0.377495 | 0.354336 | 0.335171 | 0.306012 |
| $[\text{EMIM}]_4[\text{BF}_4]_5^-$ | 0.478056 | 0.447191 | 0.420229 | 0.396537 | 0.325146 |

**Table S6.** Illustration for many-body polarization effect of  $(\text{CH}_4)_m(\text{CH}_3\text{CN})_{6-m}$  ( $m = 0,1,3,5$ ) cluster systems in optimized target state  $\Psi_S^{\text{TSO}}$ . The numbers of average transferred Mulliken charges  $\overline{\Delta\rho}^C(\text{CH}_3\text{CN})$  for the most positive central carbon atom of  $\text{CH}_3\text{CN}$  are shown. Computational method is B3LYP-D3(BJ)/aug-cc-pVDZ.

|                                           | Origin*  | 2-body   | 3-body   | 4-body   | 5-body   | 6-body   |
|-------------------------------------------|----------|----------|----------|----------|----------|----------|
| $(\text{CH}_4)_5(\text{CH}_3\text{CN})$   | 1.004001 | 0.052402 | 0.054552 | 0.056918 | 0.059249 | 0.061545 |
| $(\text{CH}_4)_3(\text{CH}_3\text{CN})_3$ | 1.000341 | 0.085728 | 0.090324 | 0.093924 | 0.097625 | 0.101412 |
| $(\text{CH}_4)(\text{CH}_3\text{CN})_5$   | 0.997286 | 0.108682 | 0.110904 | 0.112288 | 0.113787 | 0.115425 |
| $(\text{CH}_3\text{CN})_6$                | 0.999899 | 0.106939 | 0.108314 | 0.109903 | 0.111696 | 0.113590 |

\*The Mulliken charges of central carbon atom in independent  $\text{CH}_3\text{CN}$  monomer.

**Table S7.** Illustration for many-body polarization effect of  $(\text{CH}_4)_m(\text{CH}_3\text{CN})_{6-m}$  ( $m = 1,3,5,6$ ) cluster systems in optimized target state  $\Psi_S^{\text{TSO}}$ . The numbers of average transferred Mulliken charges  $\overline{\Delta\rho}^C(\text{CH}_4)$  for the most positive central carbon atom of  $\text{CH}_4$  are shown. Computational method is B3LYP-D3(BJ)/aug-cc-pVDZ.

|                                           | Origin*  | 2-body   | 3-body   | 4-body   | 5-body   | 6-body   |
|-------------------------------------------|----------|----------|----------|----------|----------|----------|
| $(\text{CH}_4)(\text{CH}_3\text{CN})_5$   | 1.246166 | 0.111356 | 0.109147 | 0.107261 | 0.105475 | 0.103704 |
| $(\text{CH}_4)_3(\text{CH}_3\text{CN})_3$ | 1.247238 | 0.140870 | 0.139586 | 0.138405 | 0.137277 | 0.136136 |
| $(\text{CH}_4)_5(\text{CH}_3\text{CN})$   | 1.247395 | 0.162999 | 0.163967 | 0.161859 | 0.165865 | 0.166715 |
| $(\text{CH}_4)_6$                         | 1.249296 | 0.131034 | 0.130665 | 0.130402 | 0.130140 | 0.129367 |

\* The Mulliken charges of central carbon atom in independent  $\text{CH}_4$  monomer.

### S3. Kinetic Stability of Acetonitrile-Methane Clusters

To explore the kinetic stability of acetonitrile-methane clusters  $(\text{CH}_4)_m(\text{CH}_3\text{CN})_{6-m}$ , we performed NVT ab initio molecular dynamics (AIMD) simulations for 3 ones:  $(\text{CH}_4)_6$ ,  $(\text{CH}_4)_3(\text{CH}_3\text{CN})_3$ , and  $(\text{CH}_3\text{CN})_6$ . The forces were evaluated at B3LYP-D3(BJ)/def2-SVP level of theory. Temperature was controlled at 298.15 K with Nosé–Hoover chain algorithm with chain length and time constant to be 5 and 0.5 ps, respectively. The time step of AIMD was 0.5 fs, and equation-of-motion was integrated for 1 ps.

For  $(\text{CH}_4)_6$ , the cluster disintegrates in less than 200 fs (Figure S3(a)), since they are only loosely bound by weak dispersion interactions. In contrast, for  $(\text{CH}_3\text{CN})_6$ , the cluster keeps bound in 1 ps and exhibits only small vibrations (Figure S3(c)), resulting from their strong dipole-dipole interactions. For  $(\text{CH}_4)_3(\text{CH}_3\text{CN})_3$ , the cluster experiences large deformation but is still bound within 1 ps (Figure S3(b)). The different kinetic stabilities of these clusters are in line with their interaction strengths.

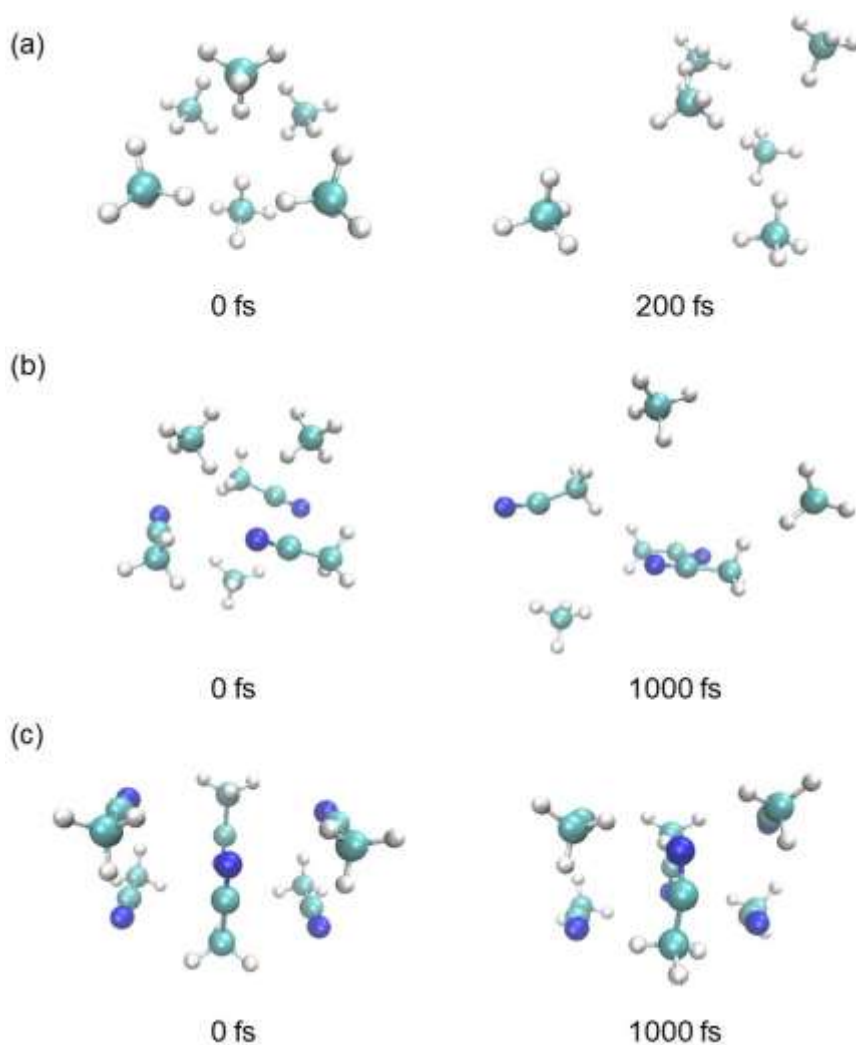

**Figure S3.** The geometry snapshots of NVT AIMD simulations of (a)  $(\text{CH}_4)_6$ , (b)  $(\text{CH}_4)_3(\text{CH}_3\text{CN})_3$ , and (c)  $(\text{CH}_3\text{CN})_6$  clusters.

#### S4. Geometries of Acetonitrile-Methane Clusters

Below are the geometries of acetonitrile-methane clusters  $(\text{CH}_4)_m(\text{CH}_3\text{CN})_{6-m}$  ( $m = 0, 1, 3, 5, 6$ ) predicted with ABCluster (<http://zhjun-sci.com/abcluster>).

##### $(\text{CH}_3\text{CN})_6$

|   |             |             |            |
|---|-------------|-------------|------------|
| C | 0.61031825  | -0.09202876 | 5.07813859 |
| H | -0.05543391 | -0.85301403 | 5.42824667 |
| H | 0.27941647  | 0.86189891  | 5.43229266 |
| H | 1.59708745  | -0.28556542 | 5.44382862 |
| C | 0.62454489  | -0.09117346 | 3.53820454 |
| N | 0.63513728  | -0.09053666 | 2.39165365 |
| C | 5.25881476  | 5.62742404  | 1.41860485 |
| H | 5.58974625  | 4.67358629  | 1.06423486 |
| H | 5.92444410  | 6.38852842  | 1.06852371 |
| H | 4.27197137  | 5.82093671  | 1.05310238 |
| C | 5.24482891  | 5.62630241  | 2.95854093 |
| N | 5.23441580  | 5.62546730  | 4.10509334 |
| C | -0.72781204 | 3.05897554  | 1.39672408 |
| H | -1.73586184 | 3.10197472  | 1.04051229 |
| H | -0.26248494 | 2.16270823  | 1.04306509 |
| H | -0.18574177 | 3.90831214  | 1.03660429 |
| C | -0.72687300 | 3.06463404  | 2.93671340 |
| N | -0.72617385 | 3.06884705  | 4.08330545 |
| C | 2.21139789  | 4.43908885  | 5.00090932 |
| H | 2.87447903  | 5.10506800  | 5.51247101 |
| H | 1.26872516  | 4.41616465  | 5.50661843 |
| H | 2.06911335  | 4.77926939  | 3.99645355 |
| C | 2.81858522  | 3.02396222  | 4.98246524 |
| N | 3.27066379  | 1.97033613  | 4.96873279 |
| C | 6.59786117  | 2.47590029  | 5.09931852 |
| H | 6.13276214  | 3.37218000  | 5.45324756 |
| H | 7.60601580  | 2.43271879  | 5.45520993 |
| H | 6.05579220  | 1.62658433  | 5.45948894 |



|   |            |            |            |
|---|------------|------------|------------|
| C | 6.59644116 | 2.47045667 | 3.55932880 |
| N | 6.59538390 | 2.46640364 | 2.41273645 |
| C | 3.65821725 | 1.09534952 | 1.49551345 |
| H | 3.80052580 | 0.75516045 | 2.49996347 |
| H | 4.60085922 | 1.11815319 | 0.98974156 |
| H | 2.99502119 | 0.42944749 | 0.98400142 |
| C | 3.05120504 | 2.51055092 | 1.51398469 |
| N | 2.59925685 | 3.56423268 | 1.52773736 |

**(CH<sub>4</sub>)(CH<sub>3</sub>CN)<sub>5</sub>**

|   |             |            |            |
|---|-------------|------------|------------|
| C | 1.78408557  | 2.36735764 | 1.55417874 |
| H | 1.15991689  | 2.79344940 | 0.77104865 |
| H | 1.39850584  | 1.38860358 | 1.83310928 |
| H | 2.80431908  | 2.26486618 | 1.18941507 |
| H | 1.77360044  | 3.02251139 | 2.42314198 |
| C | -1.35787715 | 3.11871359 | 3.80066207 |
| H | -2.29295069 | 2.61025537 | 3.69108151 |
| H | -0.98388755 | 3.38952838 | 2.83542106 |
| H | -1.49857912 | 4.00121848 | 4.38912376 |
| C | -0.34782825 | 2.19059348 | 4.50065799 |
| N | 0.40419906  | 1.49956586 | 5.02183676 |
| C | 6.81177778  | 4.47074424 | 6.39933179 |
| H | 6.50496704  | 4.63035264 | 5.38676450 |
| H | 7.85899361  | 4.25256260 | 6.42452859 |
| H | 6.61712839  | 5.35200974 | 6.97412029 |
| C | 6.02629616  | 3.28668028 | 6.99314249 |
| N | 5.44146939  | 2.40509083 | 7.43526155 |
| C | 2.18933876  | 3.93746385 | 6.94275895 |
| H | 1.93437158  | 3.58712341 | 5.96441673 |
| H | 1.29828951  | 4.21752646 | 7.46476973 |
| H | 2.68860200  | 3.15931121 | 7.48138105 |
| C | 3.12018153  | 5.15857169 | 6.82432169 |
| N | 3.81323629  | 6.06774198 | 6.73613976 |

|   |            |            |            |
|---|------------|------------|------------|
| C | 3.42827111 | 6.37013050 | 3.14975154 |
| H | 3.89135880 | 5.70162547 | 2.45437323 |
| H | 4.05475317 | 6.47995561 | 4.01019199 |
| H | 3.28722968 | 7.32456702 | 2.68708824 |
| C | 2.06309696 | 5.80053581 | 3.57807552 |
| N | 1.04666275 | 5.37644668 | 3.89698219 |
| C | 3.68570246 | 0.89992217 | 4.81173923 |
| H | 4.52237877 | 0.23394066 | 4.84836659 |
| H | 2.93714892 | 0.49681985 | 4.16206608 |
| H | 3.27950079 | 1.01671065 | 5.79472435 |
| C | 4.14349912 | 2.27051804 | 4.27930221 |
| N | 4.48434954 | 3.29098896 | 3.88287864 |

**(CH<sub>4</sub>)<sub>3</sub>(CH<sub>3</sub>CN)<sub>3</sub>**

|   |             |            |            |
|---|-------------|------------|------------|
| C | 11.83673120 | 8.75849834 | 7.37638800 |
| H | 11.52995368 | 9.49054623 | 8.12098648 |
| H | 11.48221522 | 9.06855826 | 6.39525868 |
| H | 12.92262494 | 8.68701033 | 7.36382993 |
| H | 11.41213094 | 7.78787853 | 7.62547690 |
| C | 8.77383090  | 4.35309609 | 4.16896521 |
| H | 9.60239866  | 3.65873221 | 4.04339553 |
| H | 7.87403716  | 3.92758838 | 3.72879720 |
| H | 8.60875168  | 4.53290660 | 5.22955490 |
| H | 9.01013611  | 5.29315715 | 3.67411320 |
| C | 14.19200474 | 5.53866884 | 7.45434383 |
| H | 14.76869258 | 6.30781709 | 6.94417173 |
| H | 13.18018145 | 5.89960087 | 7.62862855 |
| H | 14.15637496 | 4.64283954 | 6.83737232 |
| H | 14.66276997 | 5.30441786 | 8.40720271 |
| C | 12.14281610 | 6.38269002 | 4.33118617 |
| H | 13.07223259 | 6.90664815 | 4.25023531 |
| H | 11.64888826 | 6.67022585 | 5.23576205 |
| H | 11.52262351 | 6.62503933 | 3.49361405 |

|   |             |            |            |
|---|-------------|------------|------------|
| C | 12.40865216 | 4.86594078 | 4.35125960 |
| N | 12.60657919 | 3.73665203 | 4.36620518 |
| C | 8.07522075  | 7.49165656 | 6.82458951 |
| H | 8.76679329  | 7.61778655 | 7.63126097 |
| H | 7.75176715  | 6.47236740 | 6.78816877 |
| H | 7.22939010  | 8.12903206 | 6.97697738 |
| C | 8.76276975  | 7.85979447 | 5.49667730 |
| N | 9.27468123  | 8.13388989 | 4.50798629 |
| C | 11.25794449 | 2.64057684 | 7.21985246 |
| H | 10.91488442 | 2.22337462 | 6.29619004 |
| H | 10.88364141 | 2.05766971 | 8.03533733 |
| H | 12.32776394 | 2.63438040 | 7.23848152 |
| C | 10.75067000 | 4.08890751 | 7.34873558 |
| N | 10.37298109 | 5.16725553 | 7.44469492 |

**(CH<sub>4</sub>)<sub>5</sub>(CH<sub>3</sub>CN)**

|   |             |             |            |
|---|-------------|-------------|------------|
| C | 9.77734669  | 9.05533543  | 7.26217921 |
| H | 10.05655380 | 9.82102854  | 7.98342183 |
| H | 9.05133645  | 9.46402297  | 6.56195275 |
| H | 10.66195195 | 8.72924684  | 6.71851272 |
| H | 9.33954458  | 8.20704337  | 7.78482953 |
| C | 4.92846395  | 6.02991808  | 4.04138788 |
| H | 5.24791040  | 5.86353589  | 5.06837590 |
| H | 3.84449672  | 5.95320378  | 3.98169335 |
| H | 5.24012817  | 7.02213520  | 3.72075715 |
| H | 5.38132049  | 5.28079747  | 3.39472512 |
| C | 6.11603798  | 7.78460995  | 7.36544785 |
| H | 6.17484959  | 8.28244384  | 6.39945816 |
| H | 6.50361851  | 6.77161456  | 7.27569736 |
| H | 6.70706982  | 8.33591736  | 8.09426536 |
| H | 5.07861400  | 7.74846403  | 7.69237051 |
| C | 6.71617028  | 11.48050455 | 6.60989563 |
| H | 6.97776184  | 10.93523577 | 5.70508334 |

|   |            |             |            |
|---|------------|-------------|------------|
| H | 5.90135197 | 10.96914381 | 7.11883059 |
| H | 7.58178946 | 11.52808871 | 7.26782621 |
| H | 6.40377784 | 12.48954990 | 6.34784239 |
| C | 3.94619061 | 9.67991176  | 4.72576604 |
| H | 3.74438381 | 8.78710309  | 5.31449362 |
| H | 4.97661888 | 9.65869855  | 4.37619338 |
| H | 3.27358794 | 9.71032612  | 3.87071395 |
| H | 3.79017182 | 10.56351929 | 5.34166322 |
| C | 8.68856494 | 6.53797350  | 4.64021654 |
| H | 8.11851718 | 5.73924588  | 4.21362549 |
| H | 8.64265813 | 6.47847651  | 5.70757391 |
| H | 9.70709507 | 6.45878041  | 4.32205944 |
| C | 8.10915607 | 7.88715663  | 4.17589959 |
| N | 7.67775983 | 8.89168480  | 3.83019451 |

**(CH<sub>4</sub>)<sub>6</sub>**

|   |            |             |            |
|---|------------|-------------|------------|
| C | 2.19005710 | 2.29104709  | 5.68186921 |
| H | 1.17424371 | 1.90332038  | 5.72903503 |
| H | 2.16228594 | 3.37864326  | 5.65364138 |
| H | 2.74395993 | 1.96497210  | 6.56010620 |
| H | 2.67973883 | 1.91725263  | 4.78469421 |
| C | 4.32841774 | 1.13566675  | 1.65323371 |
| H | 5.21938840 | 0.53430616  | 1.82344003 |
| H | 3.81154601 | 1.29376120  | 2.59784116 |
| H | 4.61480492 | 2.09702064  | 1.23107906 |
| H | 3.66793163 | 0.61757901  | 0.96057459 |
| C | 1.26165977 | -0.51430967 | 3.24740581 |
| H | 2.09130533 | -0.97442045 | 2.71409560 |
| H | 1.43806715 | -0.58054949 | 4.31928556 |
| H | 1.17919367 | 0.53137202  | 2.95726341 |
| H | 0.33807293 | -1.03364075 | 2.99897867 |
| C | 5.52198329 | 3.49517021  | 4.35769825 |
| H | 4.60337243 | 3.71474851  | 3.81698305 |

|   |            |             |            |
|---|------------|-------------|------------|
| H | 5.27847142 | 3.13720947  | 5.35619690 |
| H | 6.08259886 | 2.72970006  | 3.82459500 |
| H | 6.12349044 | 4.39902282  | 4.43301806 |
| C | 1.45061933 | 3.53138314  | 2.18606477 |
| H | 1.54997168 | 2.74650172  | 1.43872032 |
| H | 1.07750157 | 4.43767510  | 1.71293531 |
| H | 0.75303121 | 3.21138035  | 2.95768806 |
| H | 2.42197287 | 3.72997539  | 2.63491541 |
| C | 4.69087959 | -0.54538860 | 5.07392680 |
| H | 3.80476645 | -0.53283801 | 5.70565415 |
| H | 5.47662900 | -1.11838982 | 5.56249710 |
| H | 4.44813694 | -1.00465778 | 4.11758937 |
| H | 5.03398598 | 0.47433123  | 4.90996659 |
